# Supplementary material for: WNT7A-positive dendritic cytonemes control synaptogenesis in cortical neurons
Source: PubMed Central journal article supplement (PMC11658684; doi:10.1242/dev.202868), 2024-12-09
Supplement: develop-151-202868-s1.pdf [file develop-151-202868-s1.pdf]

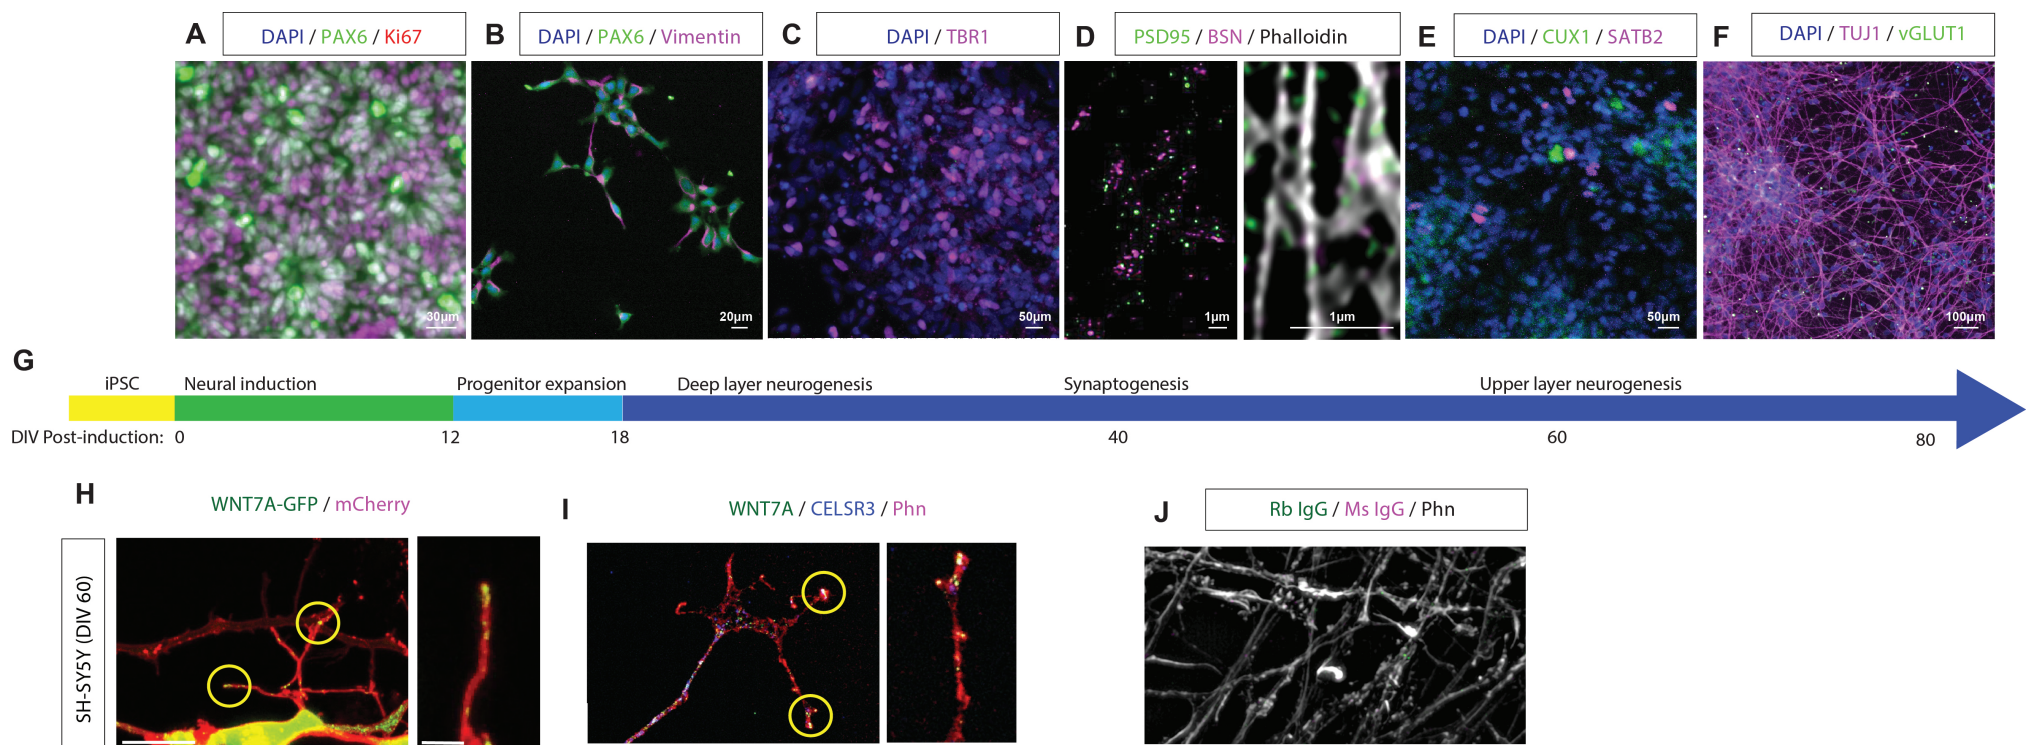

**Fig. S1. related to Figure 1. Quantification methodology and negative controls.** Characterisation of iPSC differentiation into cortical neurons from PAX6/Vimentin positive progenitors (A/B) to deep layer cortical neurogenesis (TBR1+; C), early synaptogenesis (D), upper layer neurogenesis (Cux1/SATB2+; E), leading to complex neuronal networks (F). (G) Schematic timeline of iPSC-derived cortical neuron differentiation. (H) Overexpression of Wnt7a-GFP in SH-SY5Y-derived neurons shows localisation to the dendritic filopodia tips (yellow circles). (I) Antibody staining for Wnt7a protein in SH-SY5Y-derived neurons indicates co-localisation with CELSR3 at the filopodia tips (yellow circle). (J) IgG isotype controls for primary antibodies.

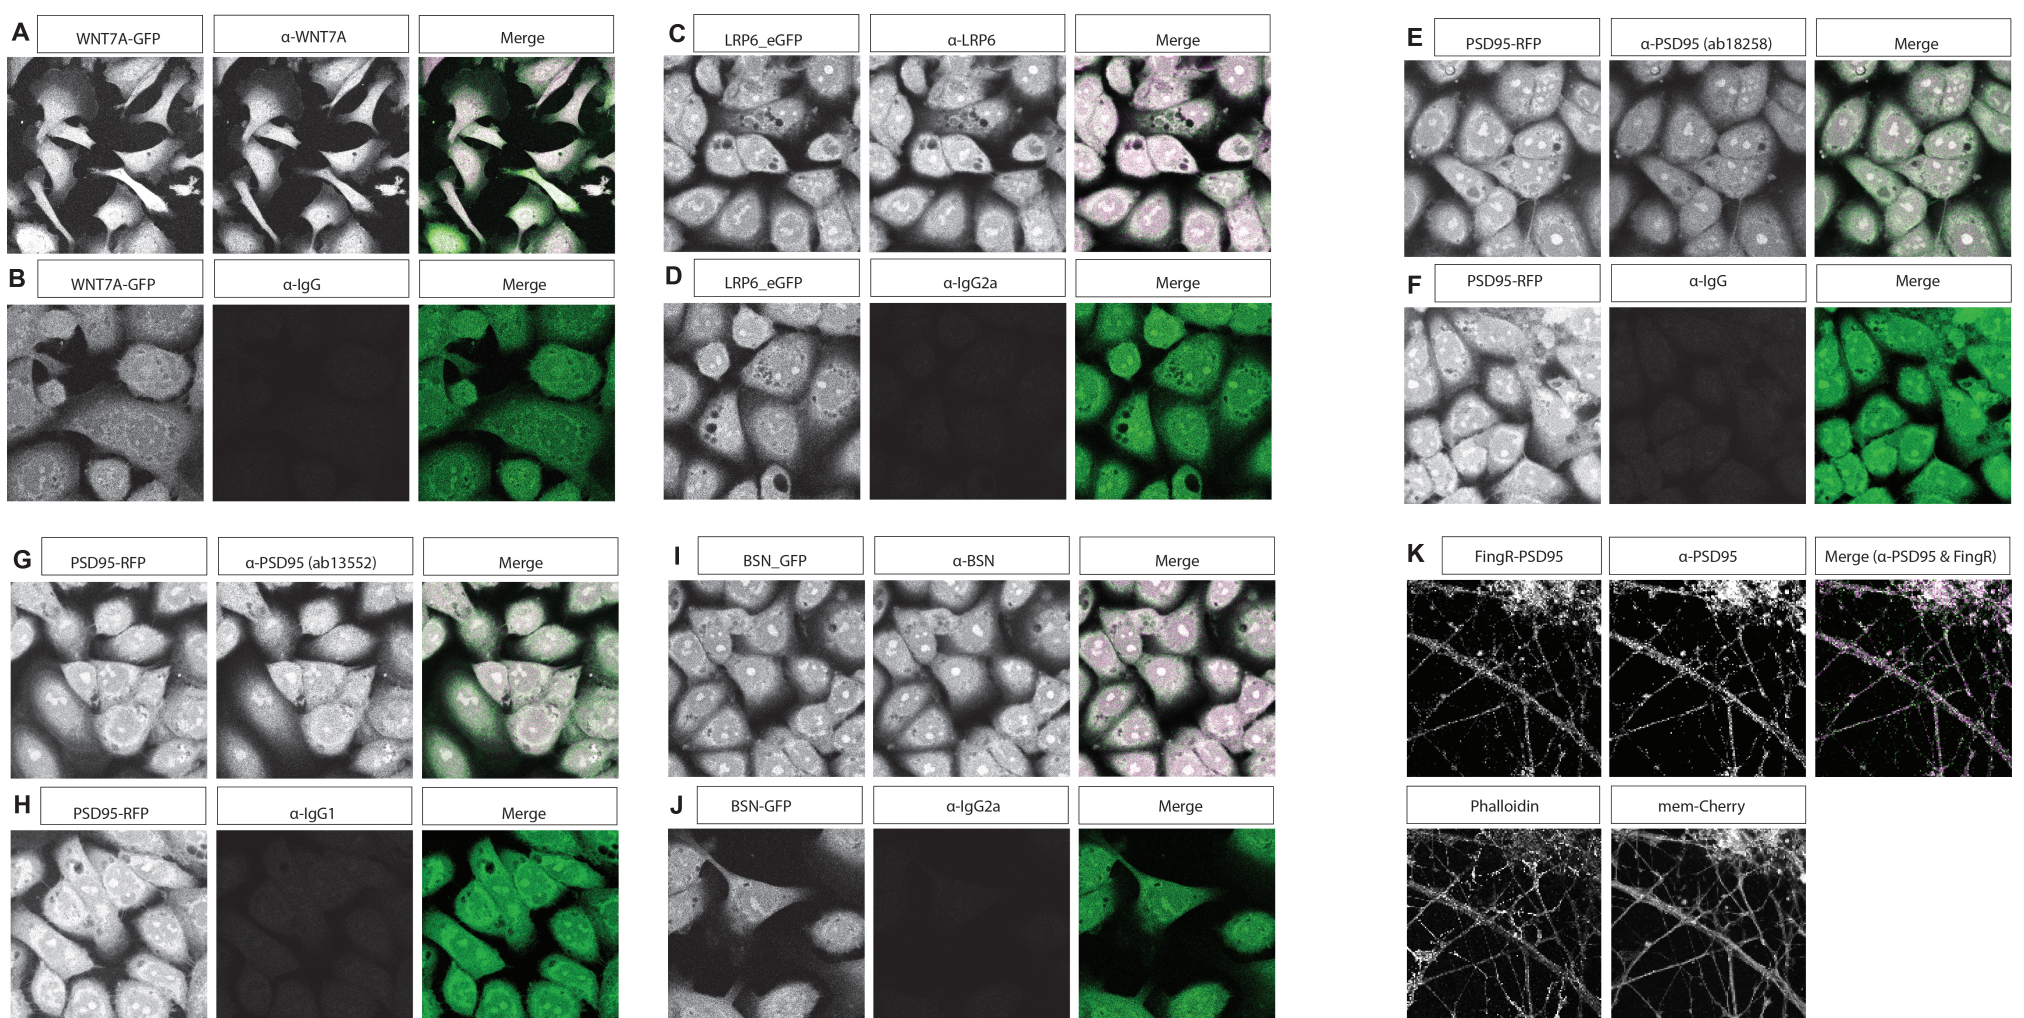

**Fig. S2. Antibody specificity controls.** To confirm the antibodies used to positively identify Wnt signalling components, and synaptic markers were specific we performed a number of AGS transfections followed by post-staining with antibodies and isotype controls. Specifically, cells were transfected with Wnt7a-GFP and subsequently stained with  $\alpha$ -Wnt7a or  $\alpha$ -IgG antibodies (A, B), LRP6-eGFP followed by staining with  $\alpha$ -LRP6 or  $\alpha$ -IgG2a antibodies (C, D), PSD95-RFP and stained with  $\alpha$ -PSD95 (ab18258),  $\alpha$ -IgG,  $\alpha$ -PSD95 (ab13552), or  $\alpha$ -IgG1 antibodies (E, F, G, H), and GFP-BSN followed by staining with  $\alpha$ -BSN or  $\alpha$ -IgG2a antibodies (I, J). To confirm endogenous tagging of PSD-95 with the FingR construct was specific, SH-SY5Y neurons were transfected with FingR-PSD95\_eGFP and mem-mCherry and post-stained with  $\alpha$ -PSD95 (ab18258) and Phalloidin (K).



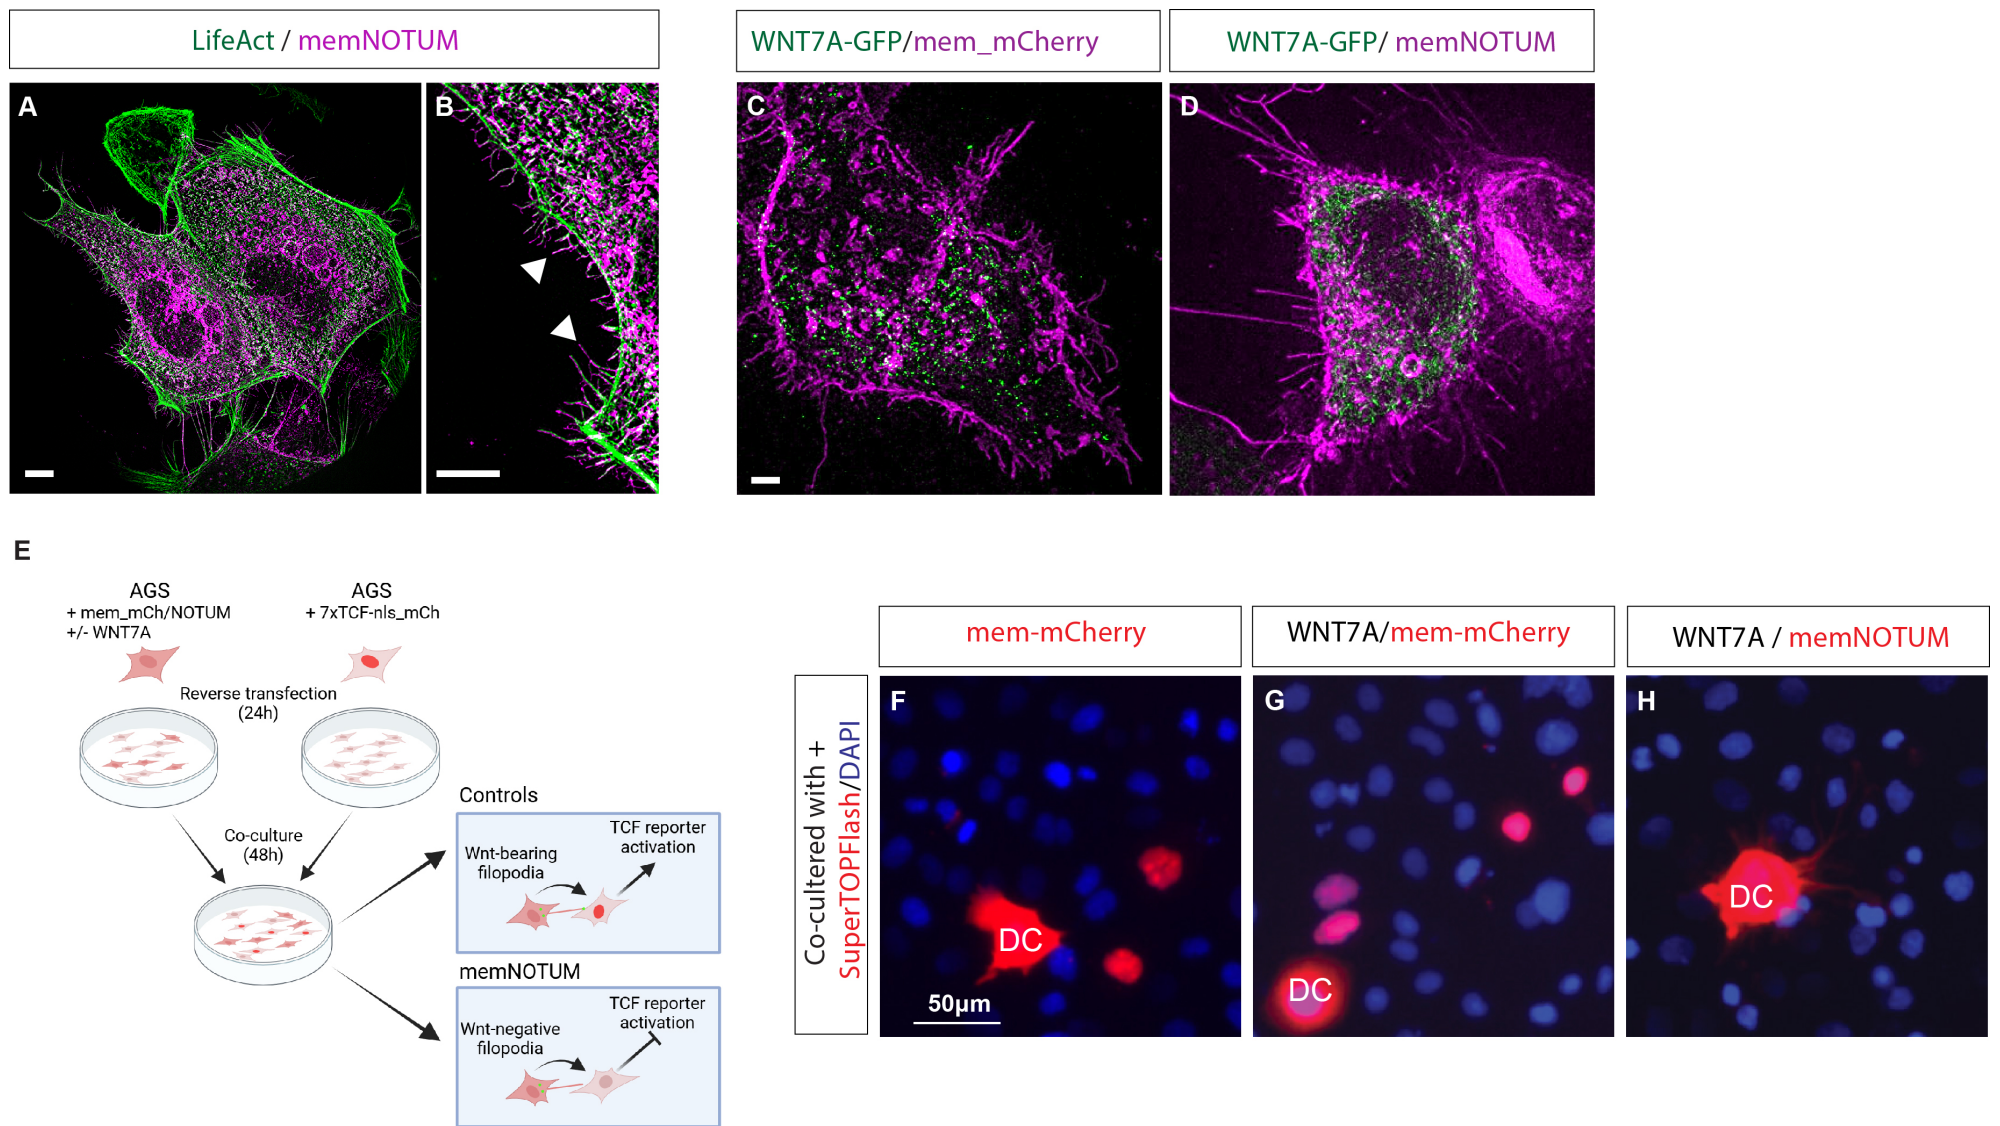

**Fig. S3. Generation and characterisation of membrane-tethered Wnt ‘scissor.’** (A) Transfection of human AGS cells with memNotum shows strong expression on all cell membranes and cellular filopodia (B). Cells were co-transfected with LifeAct-GFP for visualisation of the actin cytoskeleton. (C) Co-transfection of the membrane marker, mem-mCherry, and Wnt7a-GFP show localisation of Wnt7a-GFP to filopodia tips. (D) Co-transfection of memNotum and Wnt7a-GFP reduces Wnt7a-GFP positive filopodia. (E) Schematic of SuperTOPFlash-based TCFx7-NLS-mCherry reporter assay set-up. (F) TCF reporter expression can be observed in cells around the control donor cell (DC) population (mem-Ch). (G) Reporter activity is increased if the donor cell population is co-transfected with Wnt7a-GFP (mem-mCherry). (H) TCF reporter activity is significantly reduced if donor cells are transfected with memNotum.
